# Supplementary material for: The microtubule targeting agent ST-401 triggers cell death in interphase and prevents the formation of polyploid giant cancer cells
Source: J Transl Med. 2024 May 10;22:441. doi: 10.1186/s12967-024-05234-3 (PMC11084142; doi:10.1186/s12967-024-05234-3)
Supplement: Supplementary file 1 — Additional file 1: Additional figures. [file 12967_2024_5234_MOESM1_ESM.pdf]

# Mitosis exit followed by death in interphase prevents the development of polyploid giant cancer cells:

Juan Jesus Vicente, Kainat Khan, Grant Tillinghast, José L. McFaline-Figueroa, Yasemin Sancak and Nephi Stella

## Supplementary Figures

**Figure S1a-b:** GI50, TGI and LC50 MeanGraph and concentration/response curves for ST-401.

**Figure S1c:** NCI60 Mean Graphs – 12 highest correlations between ST-401 and Approved Agents (169 NSC)

**Figure S1d:** Tumorigenesis parameters of cancer cell line in the NCI-60 expressed as a function of ST-401 induced TGI.

**Figure S3a:** Four h treatment with NOC disrupts the cell cycle of HCT-116: milder response by ST-401.

**Figure S3b-d:** NOC treated cells are bigger than ST-401 treated cells after 24h.

**Figure S4a-b:** Representative images of cells dying under drug treatment, and quantification of cell death before and after mitosis.

**Figure S4c-f:** Quantification of apoptosis/necrosis levels in HCT116 treated cells measured by flow cytometry.

**Figure S4g:** NOC trigger apoptosis: milder response by ST-401.

**Figure S4h-j:** NOC treated cells with increased autophagosomes are bigger than ST-401 treated cells after 24h.

**Figure S5a-d:** Overview of single-cell RNA-seq sample metrics.

**Figure S5e-f:** Summary of differential gene expression analysis of vehicle, NOC and ST-401 exposed cells.

**Figure S5g-h:** Gene-enrichment analysis at 24h using Metascape.

**Figure S5i:** Dimensionality reduction using Principal Component Analysis (PCA) analysis of the cluster distribution of CTR, NOC and ST-401 treated HCT116 cells for 8h and 24h.

**Figure S6a-b:** Ponceau Red staining of gels shown in Figure 6.

**Figure S7a-b:** NOC (100 nM) and ST-401 (100 nM) treatment for 24h affects spare capacity and proton leak in HCT-116 cells.

**Figure S8a-b:** NOC (100 nM) and ST-401 (100 nM) treatment for 24h affects non-mitochondrial respiration and maximal respiration as measured by Cell Mito Stress Test, in SF-539 and SNB-19 cells.

**Figure S9a-b:** NOC (100 nM) and ST-401 (100 nM) treatment for 24h affects mRNA encoding for immune responses in HCT-116 cells.

**Supplementary Figures S1a-b:** GI50, TGI and LC50 MeanGraph and concentration/response curves for ST-401: **a)** MeanGraph representation of the concentrations in the NCI60 cell lines for ST-401 to cause GI50 (50% growth inhibition), TGI (total growth inhibition) or LC50 (50% cell kill) in the screen. The midline for each graph is the average concentration for all of the cell lines at that endpoint. Thus, sensitivity cell lines are identified by bars drawn to the right of the average concentration for all of the cell lines at that endpoint. **b)** The concentration/response data are also presented. Correlations among the three endpoint patterns were low. The TGI endpoint was used for subsequent work since the TGI endpoint has been found to be a better indicator for mechanisms which target tubulin, and a lower correlation limit of 0.6 was used for significance.

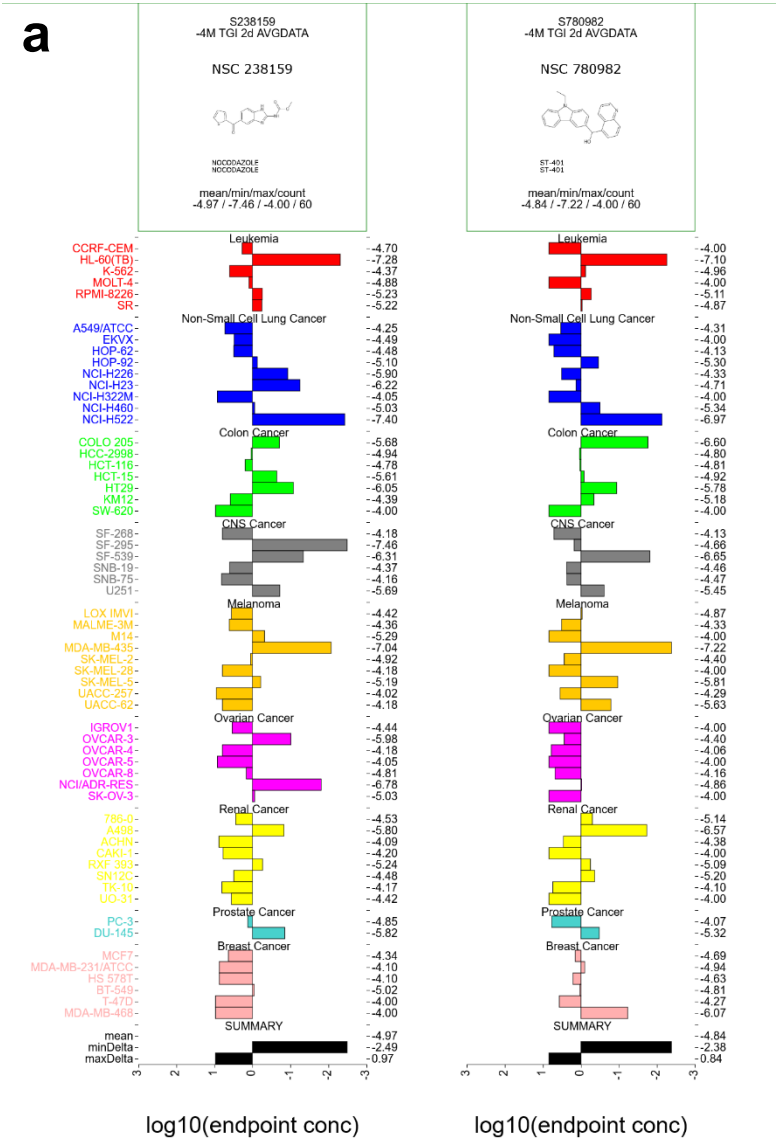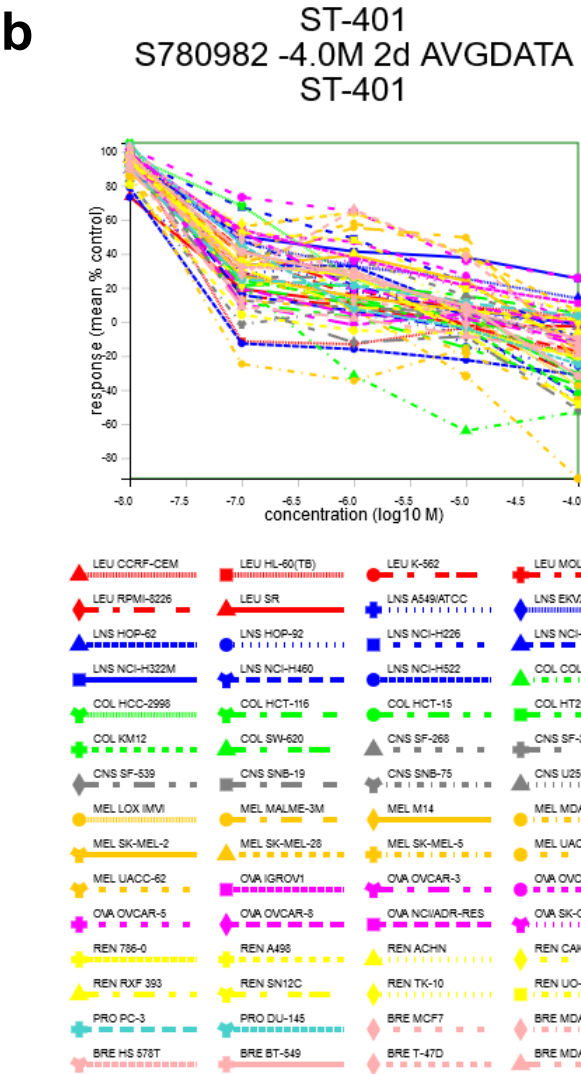

**Supplementary Figure S1c: NCI60 Mean Graphs – 12 highest correlations between ST-401 and Approved Agents (169 NSC):** MeanGraph showing the TGI patterns for ST-401 and the most-highly correlated TGI patterns in the NCI60 set of Approved Agents, ordered by decreasing correlation.

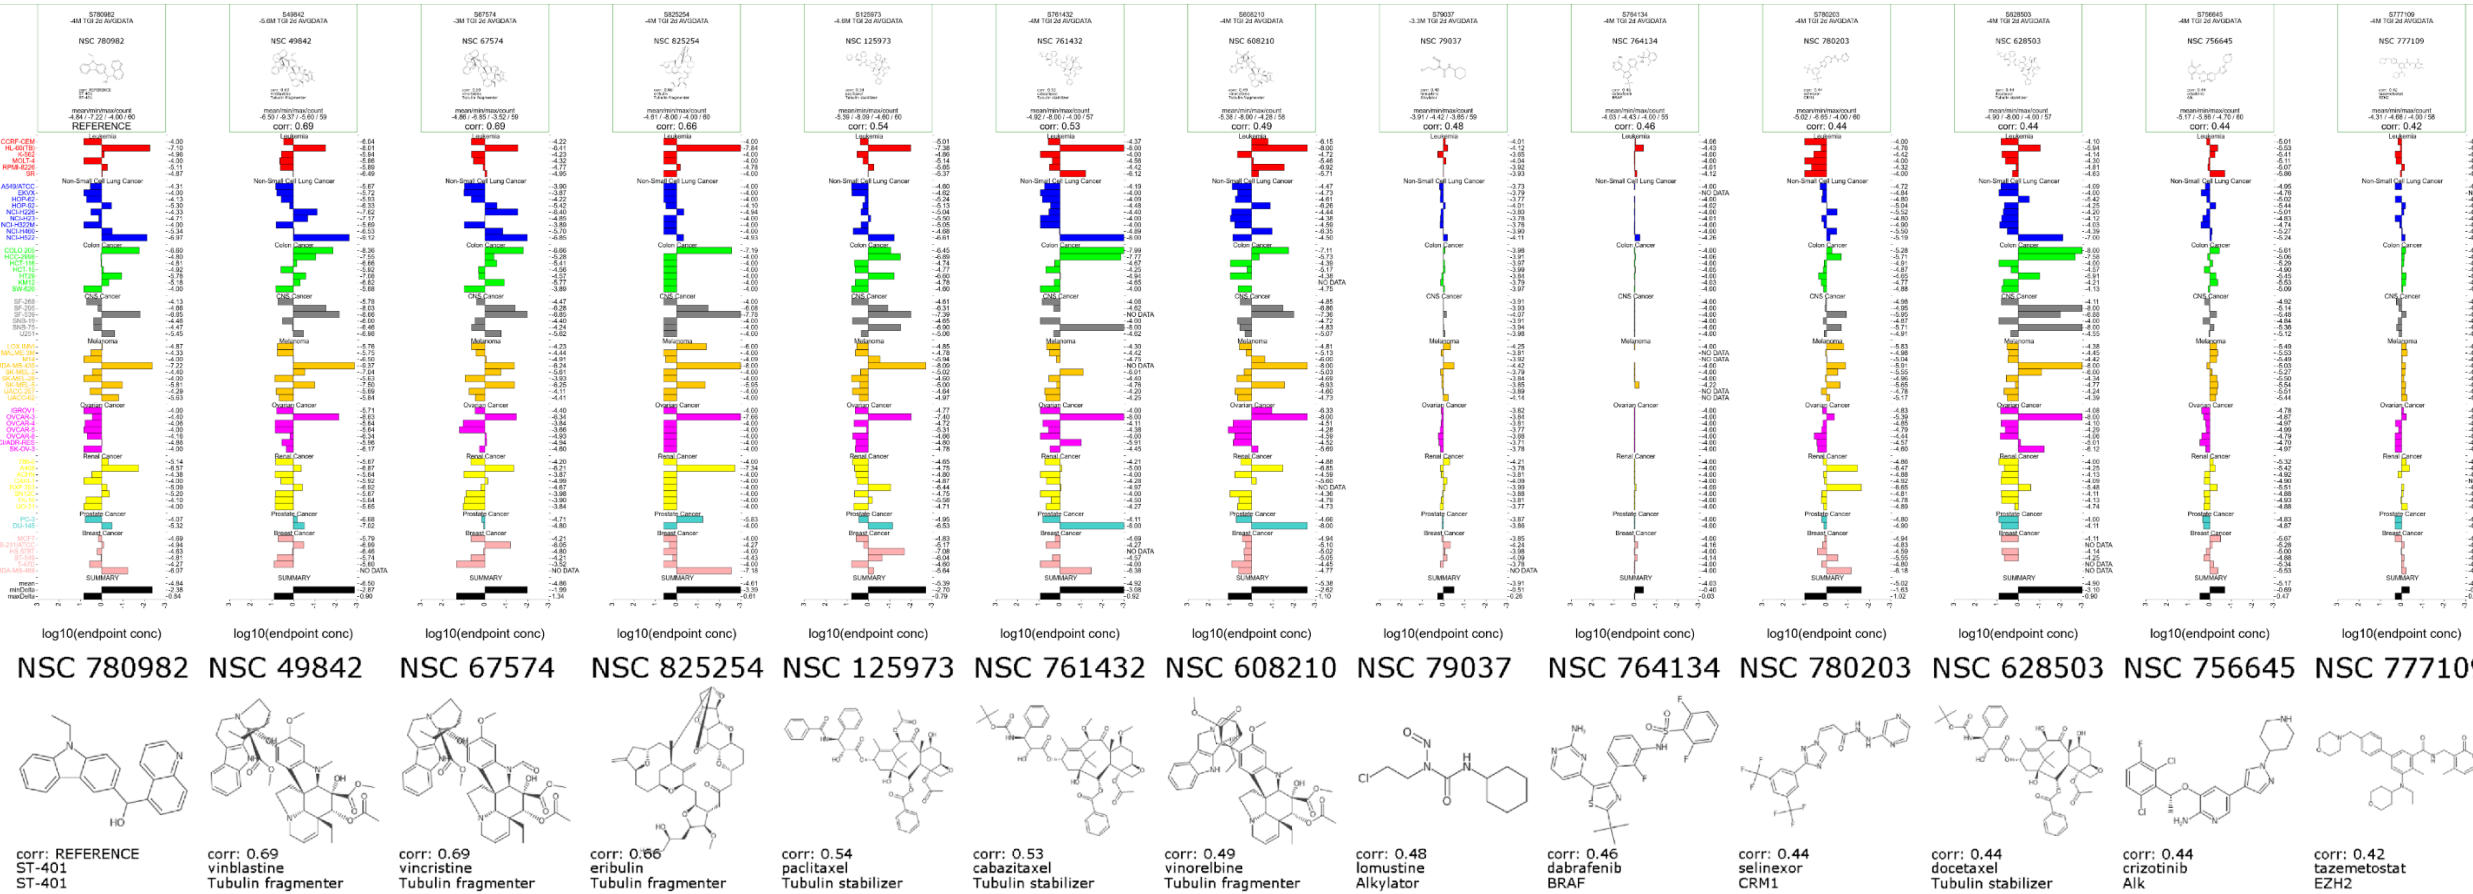

**Supplementary Figure S1d:** Tumorigenesis parameters of cancer cell line in the NCI-60 expressed as a function of ST-401 induced TGI:  
Table provides the sensitivity expressed at TGI of the first 31 cell lines that are most sensitive to ST-401 (from MDA-MB-435 to SNB-19 cells). Also shown is whether the cell lines are wild type or p53 mutants, their modal number of chromosomes (from 43 to 116) and their doubling proliferation time (from 17h to 80h).

| Cancer Type | Cell Line   | ST-401  | TP53     | M   | Doubling |
|-------------|-------------|---------|----------|-----|----------|
|             |             | (TGI)   | (WT/Mut) | (#) | (h)      |
| Melanoma    | MDA-MB-435  | 5.8E-08 | WT       | 56  | 26       |
| Leukemia    | HL-60(TB)   | 7.9E-08 | Mut      | 45  | 29       |
| Renal       | A498        | 1.4E-07 | WT       | 74  | 67       |
| Colon       | COLO 205    | 2.1E-07 | Mut      | 72  | 24       |
| NSCL        | NCI-H522    | 2.2E-07 | Mut      | 51  | 38       |
| CNS         | SF-539      | 3.1E-07 | Mut      | 88  | 35       |
| Melanoma    | SK-MEL-28   | 1.5E-06 | Mut      | 100 | 25       |
| Melanoma    | SK-MEL-5    | 1.5E-06 | WT       | 88  | 35       |
| Prostate    | DU-145      | 2.1E-06 | Mut      | 59  | 32       |
| Colon       | HT29        | 2.3E-06 | Mut      | 67  | 20       |
| Melanoma    | UACC-62     | 2.3E-06 | WT       | 73  | 31       |
| NSCL        | HOP-92      | 4.5E-06 | Mut      | 94  | 80       |
| Leukemia    | RPMI-8226   | 5.7E-06 | Mut      | 64  | 34       |
| Renal       | 786-0       | 6.7E-06 | Mut      | 83  | 22       |
| Breast      | MDA-MB-468  | 8.5E-06 | Mut      | 64  | 62       |
| Colon       | KM12        | 1.0E-05 | Mut      | 43  | 24       |
| Colon       | HCT-15      | 1.1E-05 | Mut      | 44  | 21       |
| Colon       | HCT116      | 1.1E-05 | WT       | 45  | 17       |
| NSCL        | NCI-H460    | 1.1E-05 | WT       | 53  | 18       |
| Ovarian     | NCI/ADR-RES | 1.2E-05 | WT       | 65  | 34       |
| Melanoma    | LOX IMVI    | 1.2E-05 | WT       | 64  | 21       |
| Leukemia    | SR          | 1.3E-05 | WT       | 46  | 29       |
| Breast      | MCF7        | 1.4E-05 | WT       | 65  | 25       |
| CNS         | SF-295      | 1.5E-05 | Mut      | 116 | 30       |
| CNS         | U251        | 1.5E-05 | Mut      | 52  | 24       |
| Renal       | SN12C       | 1.7E-05 | Mut      | 64  | 30       |
| Breast      | HS 578T     | 1.8E-05 | Mut      | 57  | 54       |
| Colon       | HCC-2998    | 2.0E-05 | Mut      | 44  | 32       |
| Breast      | MDA-MB-231  | 2.3E-05 | Mut      | 54  | 42       |
| Renal       | ACHN        | 2.5E-05 | WT       | 51  | 28       |
| CNS         | SNB-19      | 3.4E-05 | WT       | 61  | 35       |

**Supplementary Figure S3a:** Four h treatment with NOC disrupts the cell cycle of HCT-116: milder response by ST-401. Data were analyzed by ANOVA multi-comparison test followed by DUNETT's post test. N = 3 independent experiments. \* = P < 0.0332, \*\* = P < 0.021, \*\*\* = P < 0.0002 and \*\*\*\* = P < 0.0001 different from Vehicle.

**a**

| 4 h       | Sub-G1 |     |    | G1   |     |      | S    |     |    | G2/M |     |    | Over-G2 |     |    |
|-----------|--------|-----|----|------|-----|------|------|-----|----|------|-----|----|---------|-----|----|
|           | Mean   | SD  | p  | Mean | SD  | p    | Mean | SD  | p  | Mean | SD  | p  | Mean    | SD  | p  |
| CTR       | 0.9    | 0.2 |    | 51.2 | 3.9 |      | 21.1 | 2.1 |    | 23.7 | 1.8 |    | 3.1     | 1.4 |    |
| 10nM ST   | 1.3    | 1.0 | ns | 49.2 | 4.9 | ns   | 22.2 | 2.6 | ns | 23.2 | 2.7 | ns | 4.0     | 1.4 | ns |
| 30nM ST   | 0.9    | 0.2 | ns | 47.5 | 4.6 | ns   | 22.9 | 2.1 | ns | 24.3 | 2.9 | ns | 4.5     | 1.1 | ns |
| 50nM ST   | 0.9    | 0.4 | ns | 47.2 | 3.8 | ns   | 23.0 | 2.2 | ns | 24.5 | 2.7 | ns | 4.4     | 0.8 | ns |
| 100nM ST  | 2.3    | 0.8 | ** | 31.2 | 1.6 | **** | 26.7 | 2.1 | *  | 35.8 | 3.9 | ** | 3.9     | 0.9 | ns |
| 300nM ST  | 1.4    | 0.3 | ns | 20.6 | 1.3 | **** | 29.5 | 4.4 | ** | 44.8 | 5.1 | ** | 3.8     | 1.9 | ns |
| 10nM NOC  | 1.2    | 0.2 | ns | 45.7 | 5.2 | ns   | 22.1 | 2.1 | ns | 26.0 | 4.1 | ns | 5.0     | 0.8 | ns |
| 30nM NOC  | 1.9    | 1.0 | *  | 26.8 | 2.6 | **   | 27.3 | 2.4 | *  | 37.5 | 6.5 | ** | 6.5     | 3.1 | ns |
| 50nM NOC  | 1.6    | 0.9 | ns | 20.1 | 2.7 | **   | 29.0 | 4.5 | ** | 41.8 | 6.8 | ** | 7.5     | 2.8 | ** |
| 100nM NOC | 0.8    | 0.2 | ns | 13.8 | 3.4 | **   | 31.1 | 2.9 | ** | 47.4 | 1.3 | ** | 6.9     | 2.4 | *  |
| 300nM NOC | 0.7    | 0.1 | ns | 14.5 | 2.7 | **   | 30.6 | 2.2 | ** | 46.6 | 1.1 | ** | 7.7     | 2.7 | ** |

**Supplementary Figure S3b-d:** NOC treated cells are bigger than ST-401 treated cells after 24h. **b)** Cell treated with CTR, NOC or ST (100 nM) were analyzed by flow cytometry using the classical FSC versus SSC signal to discriminate cell size. The percentage of cells in Region B was measured and considered as cells “bigger than normal” (Region A). **c)** Quantification of Region B. Bars are median with 95% CI. **d)** Distribution of cell size (FSC-A in arbitrary units). N = 3 independent experiments.

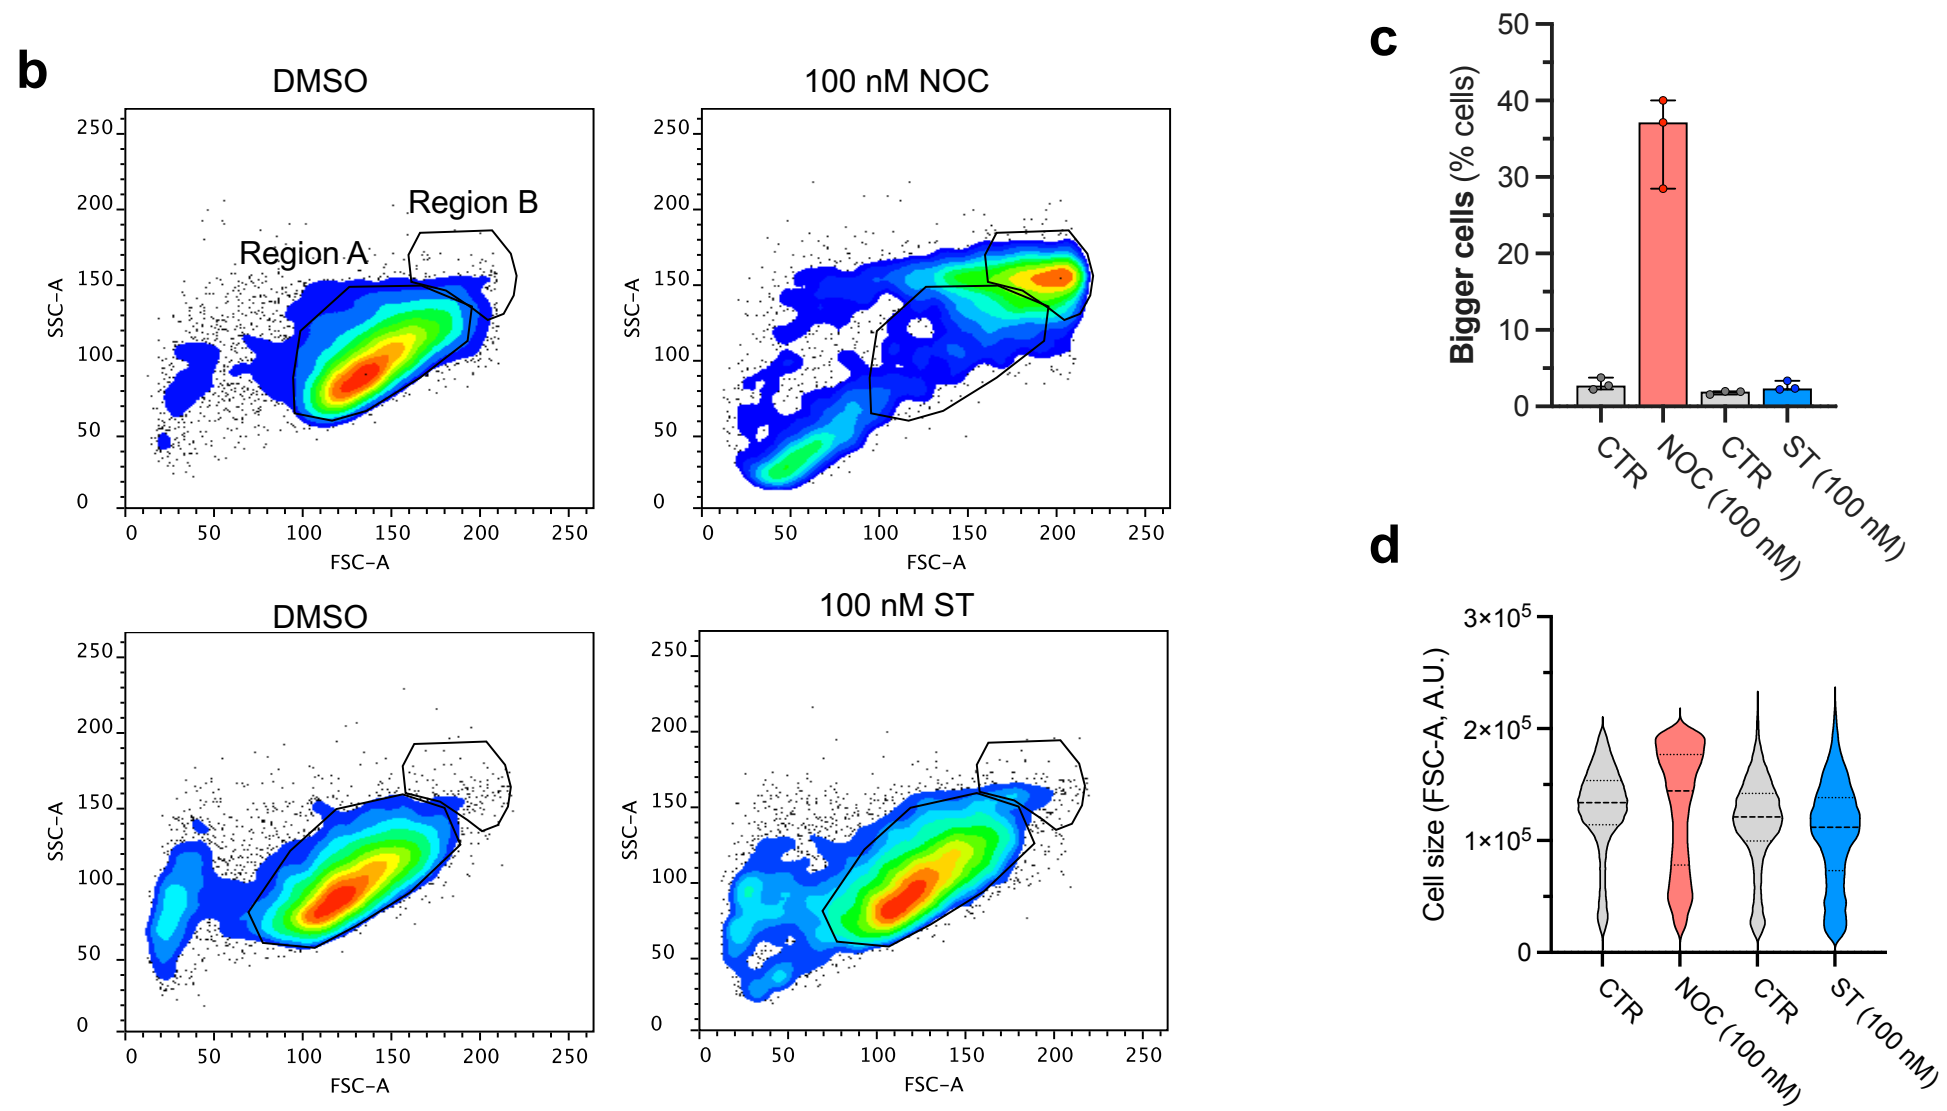

**Supplementary Figure S4a-b:** Representative images of HCT116 cells dying in response to ST-401 and NOC treatment, and quantification of death before and after mitosis during 24h treatment analyzed by live cell time-lapse microscopy. **(a)** HCT116 cells expressing H2B-mCherry were recorded for 24h following treatment with either ST-401 (100 nM) or NOC (100 nM). The cell in the top row illustrates ST-401 induced death in interphase. The cell in the bottom row illustrates NOC induced death in mitosis. The time  $t = 0$  for cell in mitosis was set when nuclear envelope breaks down. **(b)** Live cell time-lapse movies were visually analyzed and cell death before, during and after mitosis manually quantified. Data are expressed as percentage of total cell death from 3 independent experiments ( $n = 589$  cells for ST-401 and 1228 cells for NOC).

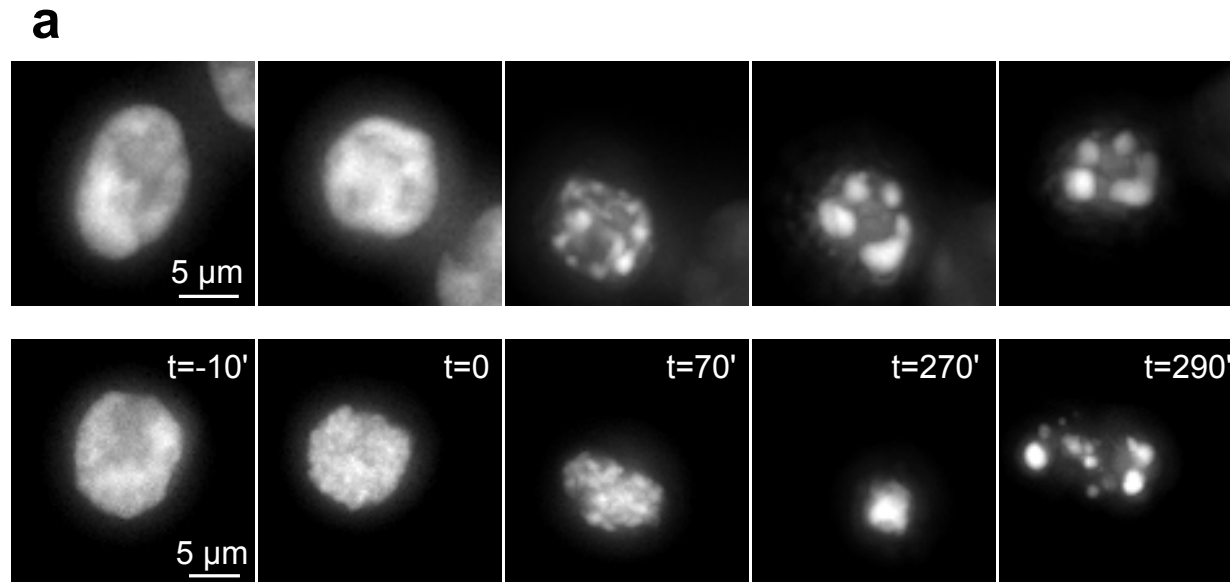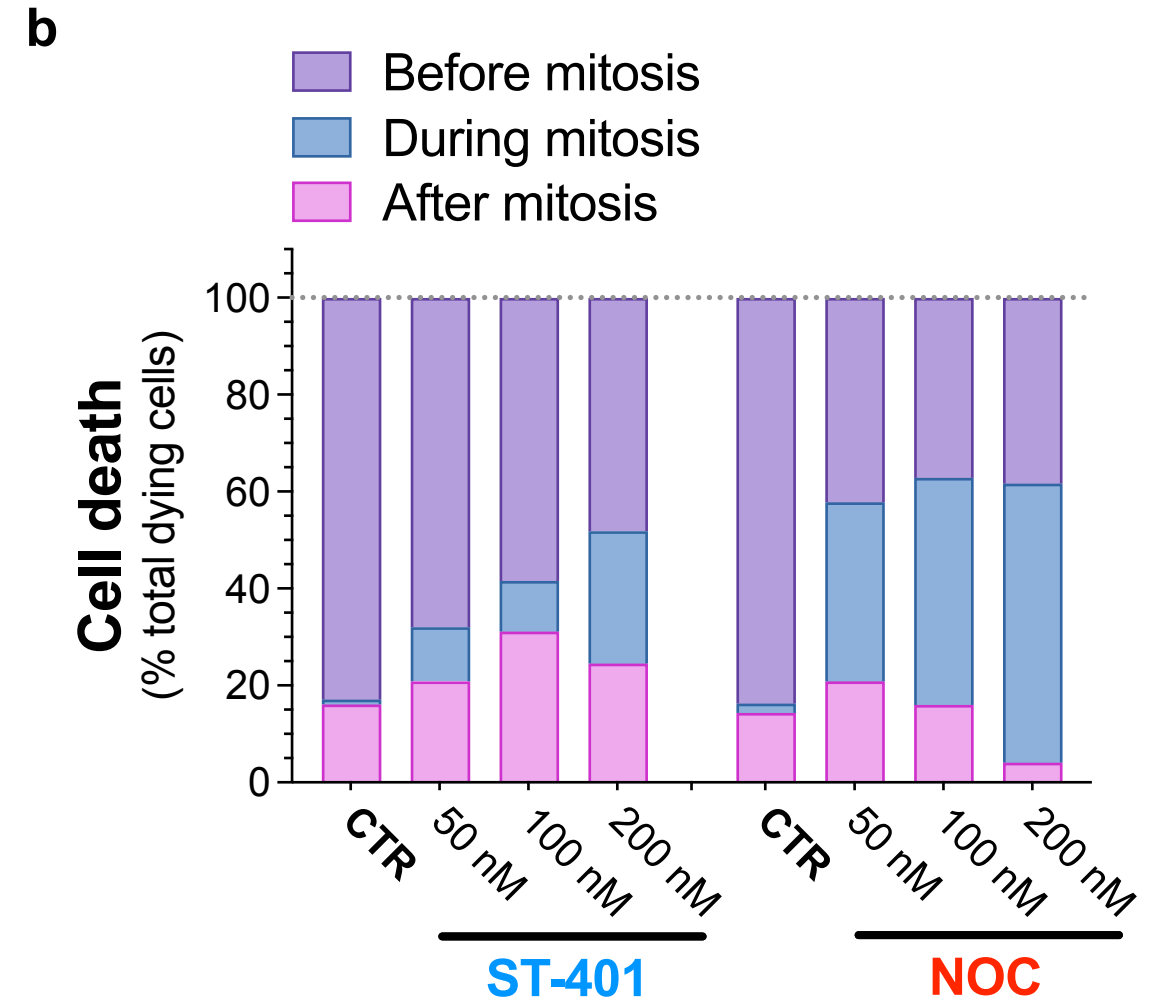

**Supplementary Figures S4c-f:** Quantification of apoptosis/necrosis levels in HCT116 treated cells measured by flow cytometry. **b-d)** Quantification of % cells in necrosis and/or apoptosis from flow cytometry data. **e)** Representative graphs of apoptosis/necrosis experiments at 100 nM. At 3 and 5 days we can see an increase in the number of cells at high FITC-A fluorescence, corresponding with high levels of Annexin V of cells going through apoptosis. Cells undergoing necrosis label A- and PI+, while labeling for A+ and PI- indicates early-apoptosis and A+/PI+ indicates late-apoptosis.

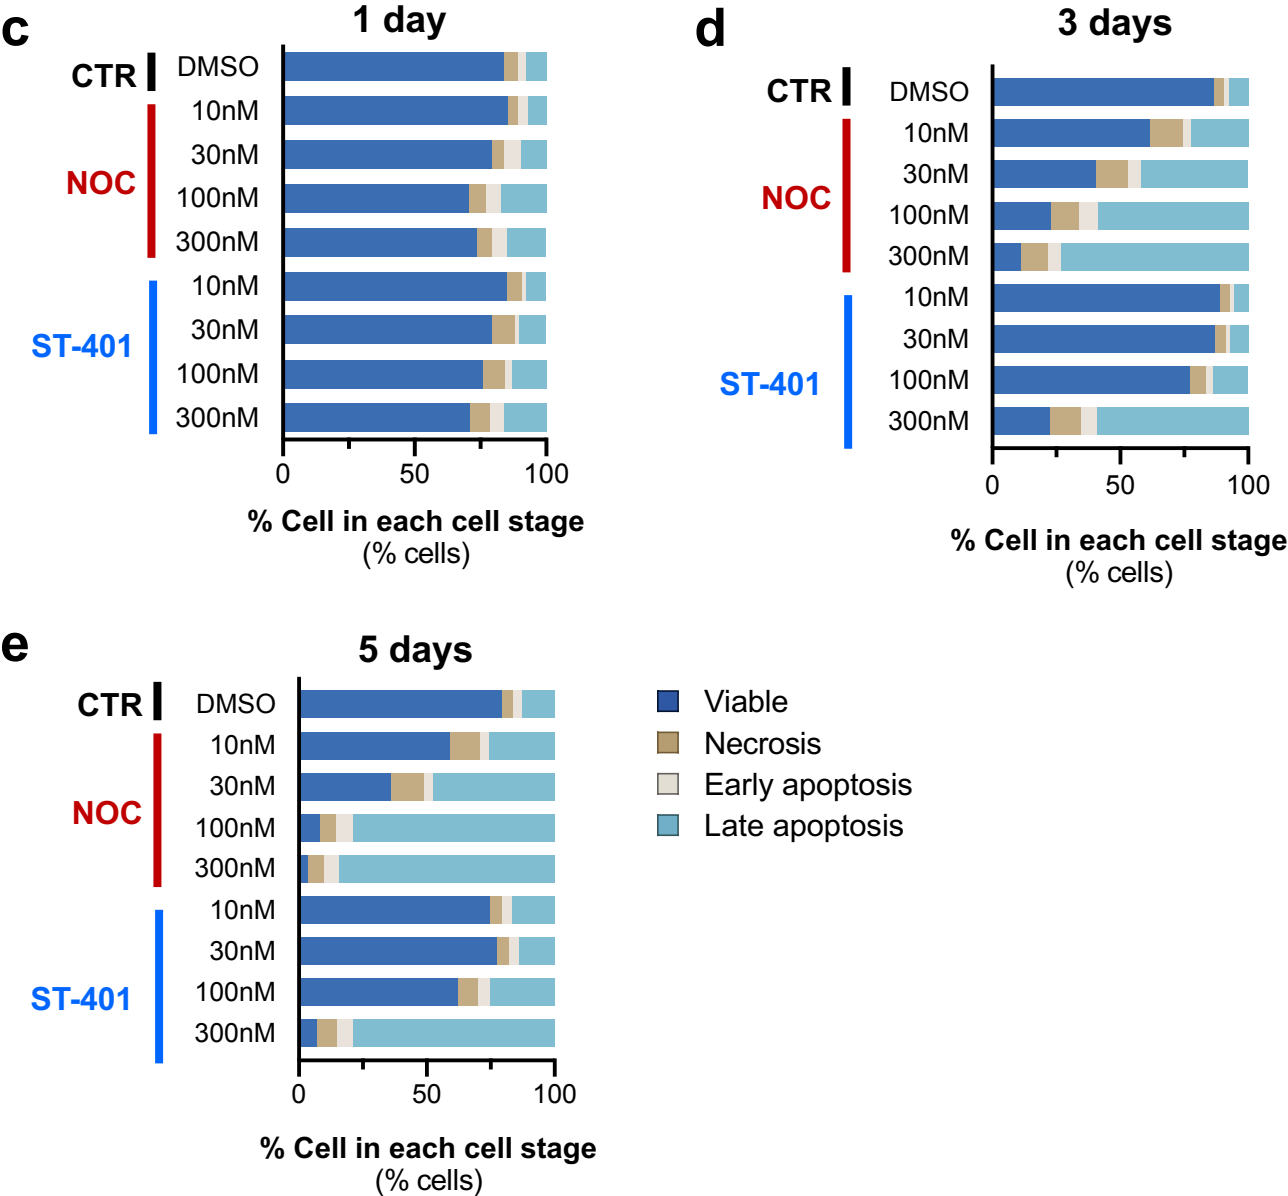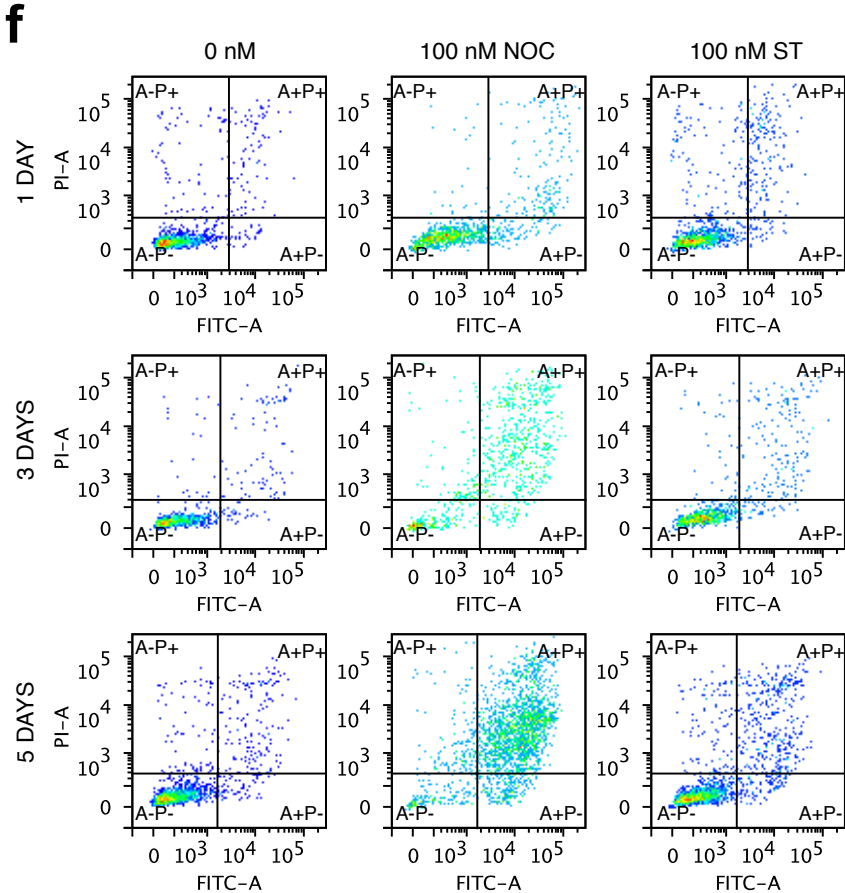

**Supplementary Figure S4g: NOC trigger apoptosis: milder response by ST-401.** Data were analyzed by ANOVA multi-comparison test followed by DUNETT's post test. N = 3 independent experiments. \* = P < 0.0332, \*\* = P < 0.021, \*\*\* = P < 0.0002 and \*\*\*\* = P < 0.0001 different from Vehicle (CTR).

| 1 day     | Viable   |          |      | Necrosis |          |    | Early apoptosis |          |    | Late apoptosis |          |      |
|-----------|----------|----------|------|----------|----------|----|-----------------|----------|----|----------------|----------|------|
|           | Mean     | SD       | p    | Mean     | SD       | p  | Mean            | SD       | p  | Mean           | SD       | p    |
| DMSO      | 83.62833 | 3.645125 |      | 5.695    | 2.095898 |    | 2.706667        | 1.533749 |    | 7.973333       | 2.163235 |      |
| 10nM ST   | 84.92333 | 1.930423 | ns   | 5.84     | 2.181582 | ns | 1.42            | 0.130767 | ns | 7.813333       | 0.550485 | ns   |
| 30nM ST   | 79.01    | 0.913947 | ns   | 8.833333 | 2.306281 | ns | 1.533333        | 0.15308  | ns | 10.62          | 1.537173 | ns   |
| 100nM ST  | 75.78333 | 5.229812 | ns   | 8.61     | 2.372109 | ns | 2.596667        | 0.67159  | ns | 13.01333       | 2.820591 | ns   |
| 300nM ST  | 71.00333 | 1.831784 | **   | 7.413333 | 1.59707  | ns | 5.496667        | 0.99143  | *  | 16.08333       | 0.725695 | **   |
| 10nM NOC  | 85.24667 | 4.737767 | ns   | 3.943333 | 0.882968 | ns | 3.733333        | 1.916907 | ns | 7.076667       | 2.17238  | ns   |
| 30nM NOC  | 79.15667 | 4.259018 | ns   | 4.833333 | 1.158462 | ns | 6.29            | 2.362478 | ** | 9.723333       | 1.348122 | ns   |
| 100nM NOC | 70.57667 | 10.19993 | **   | 6.533333 | 1.767946 | ns | 5.693333        | 1.070389 | *  | 17.19333       | 7.700424 | **   |
| 300nM NOC | 73.69667 | 1.260569 | *    | 5.333333 | 1.568991 | ns | 5.903333        | 1.024809 | *  | 15.06333       | 0.82282  | *    |
| 3 days    | Viable   |          |      | Necrosis |          |    | Early apoptosis |          |    | Late apoptosis |          |      |
|           | Mean     | SD       | p    | Mean     | SD       | p  | Mean            | SD       | p  | Mean           | SD       | p    |
| DMSO      | 86.61    | 2.59513  |      | 3.786667 | 1.155436 |    | 1.996667        | 0.325167 |    | 7.606667       | 1.669441 |      |
| 10nM ST   | 88.92667 | 3.2171   | ns   | 3.886667 | 2.066454 | ns | 1.47            | 0.610492 | ns | 5.72           | 1.795188 | ns   |
| 30nM ST   | 87.06    | 2.781924 | ns   | 3.97     | 1.51     | ns | 1.646667        | 0.754476 | ns | 7.33           | 2.536553 | ns   |
| 100nM ST  | 77.18333 | 6.473054 | ns   | 6.226667 | 3.242628 | ns | 2.733333        | 0.785642 | ns | 13.85333       | 3.995552 | ns   |
| 300nM ST  | 22.33667 | 2.061173 | **** | 12.49    | 3.461344 | *  | 6.003333        | 2.115569 | ns | 59.17667       | 4.139328 | **** |
| 10nM NOC  | 61.51    | 9.880911 | **   | 12.62667 | 0.453468 | *  | 3.43            | 2.137124 | ns | 22.43667       | 8.147443 | *    |
| 30nM NOC  | 40.32667 | 14.54225 | **** | 12.42667 | 5.645754 | *  | 5.16            | 2.06182  | ns | 42.08          | 9.078128 | **** |
| 100nM NOC | 23.05333 | 4.275714 | **** | 10.73667 | 4.134941 | ns | 7.323333        | 2.854021 | *  | 58.89667       | 5.965252 | **** |
| 300nM NOC | 11.26333 | 5.153565 | **** | 10.36333 | 3.14945  | ns | 5.053333        | 2.371863 | ns | 73.32333       | 5.237694 | **** |
| 5 days    | Viable   |          |      | Necrosis |          |    | Early apoptosis |          |    | Late apoptosis |          |      |
|           | Mean     | SD       | p    | Mean     | SD       | p  | Mean            | SD       | p  | Mean           | SD       | p    |
| DMSO      | 79.28333 | 1.696654 |      | 4.403333 | 1.475545 |    | 3.406667        | 1.301166 |    | 12.90667       | 1.92962  |      |
| 10nM ST   | 74.54667 | 4.735149 | ns   | 4.756667 | 1.030162 | ns | 4.013333        | 1.54442  | ns | 16.68667       | 2.804039 | ns   |
| 30nM ST   | 77.32667 | 2.916099 | ns   | 4.996667 | 1.310432 | ns | 3.703333        | 1.720533 | ns | 13.97667       | 2.621475 | ns   |
| 100nM ST  | 61.97    | 9.258164 | ns   | 8.093333 | 2.590103 | ns | 4.39            | 2.953032 | ns | 25.55          | 8.851107 | ns   |
| 300nM ST  | 7.09     | 0.818352 | **** | 7.613333 | 3.012812 | ns | 6.52            | 0.238118 | ns | 78.77333       | 2.906636 | **** |
| 10nM NOC  | 59.07667 | 24.96963 | ns   | 11.67667 | 8.382722 | ns | 3.353333        | 0.942992 | ns | 25.89333       | 16.83052 | ns   |
| 30nM NOC  | 35.80333 | 17.35193 | ***  | 13.21333 | 4.825022 | ns | 3.5             | 0.915369 | ns | 47.48333       | 19.6458  | **   |
| 100nM NOC | 7.956667 | 0.647482 | **** | 6.406667 | 2.185002 | ns | 6.933333        | 1.254804 | ns | 78.70333       | 0.776938 | **** |
| 300nM NOC | 3.38     | 0.301993 | **** | 6.14     | 2.865118 | ns | 6.29            | 0.746458 | ns | 84.18667       | 2.917693 | **** |

**Supplementary Figure S4h-j:** NOC treated cells with increased autophagosomes are bigger than ST-401 treated cells after 24h. **g-i)** Cells treated with CTR, NOC or ST (100 nM) were analyzed by flow cytometry using the classical FSC versus SSC signal to discriminate cell size, and for fluorescence intensity of MDC (for autophagy). The cells in the region M1 (cells positive for autophagosomes) appear at higher FSC (size) and SSC (internal complexity/granularity) values in top panels (red spots). Representative result of one out of three independent experiments.

**h**

DMSO

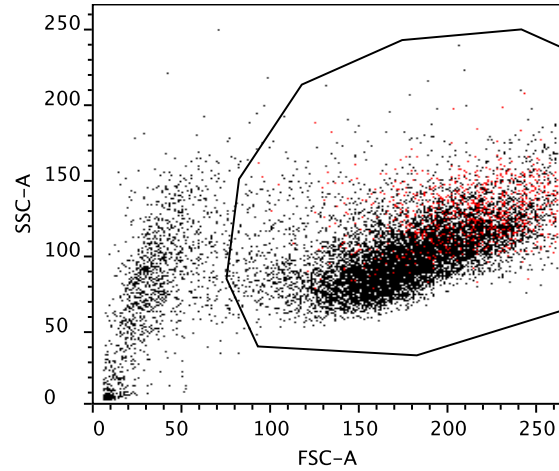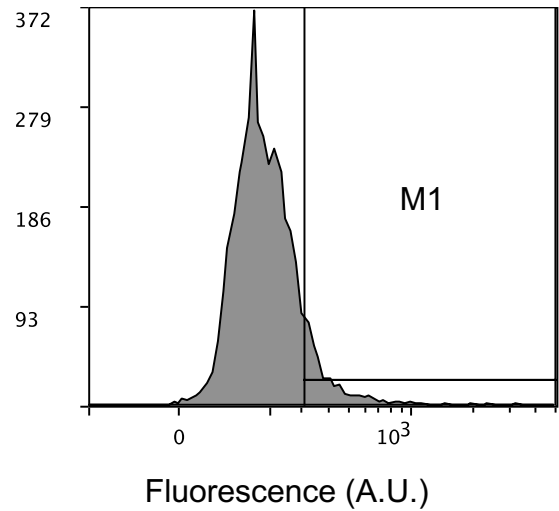

**i**

100 nM ST

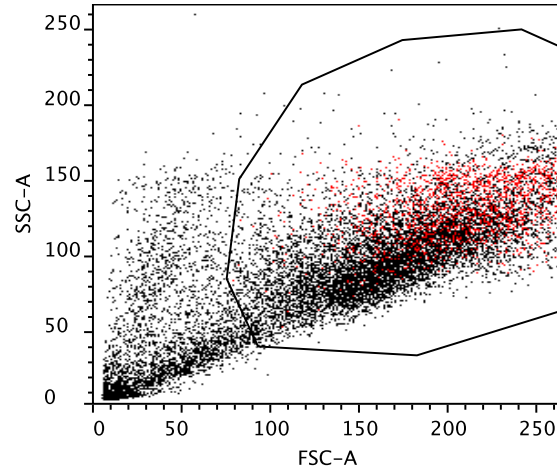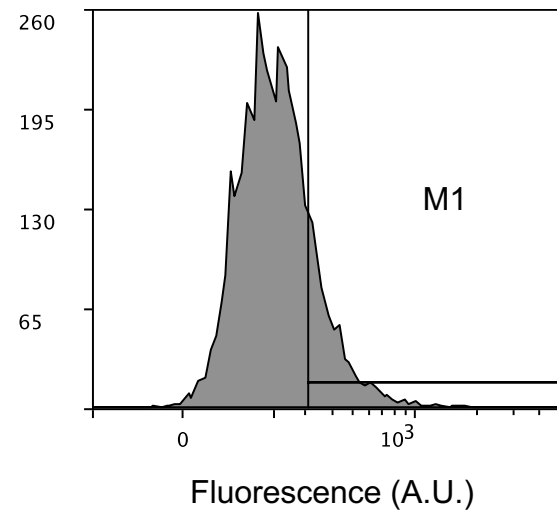

**j**

100 nM NOC

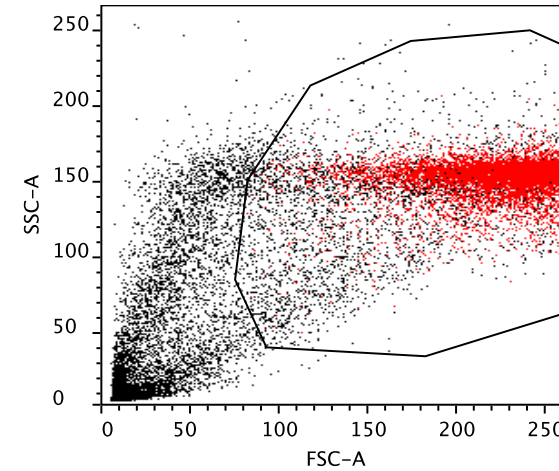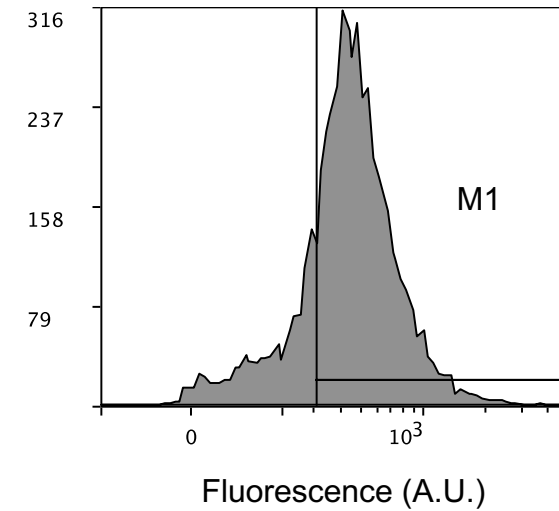

**Figure S5a-d: Overview of single-cell RNA-seq sample metrics.** **a)** Boxplots of the number of unique molecular identifiers (UMIs) for the cells in our experiment. **b)** Violin plots of the percentage of mitochondrial reads per cell) for the cells in our experiment. **c)** Summary of the total cell number per sample. **d)** Correlation or replicate expression values (Pearson's rho).

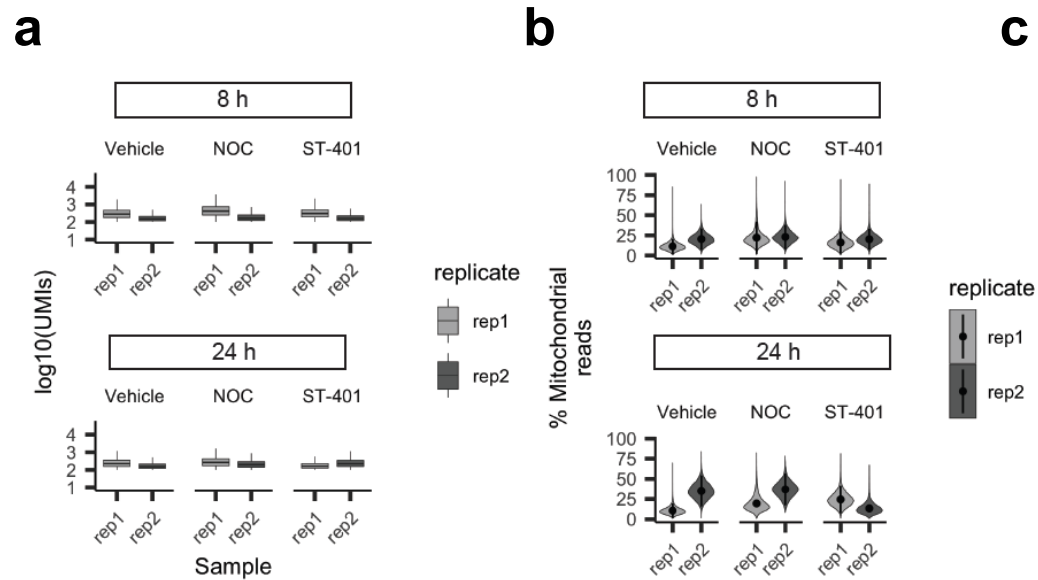

| Final cell counts (> 100 UMIs, < 25% mitochondrial reads) |            |           |             |
|-----------------------------------------------------------|------------|-----------|-------------|
| Treatment                                                 | Time point | Replicate | Total cells |
| Vehicle                                                   | 24         | Rep 1     | 43926       |
| Vehicle                                                   | 24         | Rep 2     | 2327        |
| Vehicle                                                   | 8          | Rep 1     | 29022       |
| Vehicle                                                   | 8          | Rep 2     | 6518        |
| NOC                                                       | 24         | Rep 1     | 33027       |
| NOC                                                       | 24         | Rep 2     | 219         |
| NOC                                                       | 8          | Rep 1     | 19124       |
| NOC                                                       | 8          | Rep 2     | 2768        |
| ST-401                                                    | 24         | Rep 1     | 13431       |
| ST-401                                                    | 24         | Rep 2     | 26854       |
| ST-401                                                    | 8          | Rep 1     | 28907       |
| ST-401                                                    | 8          | Rep 2     | 8042        |

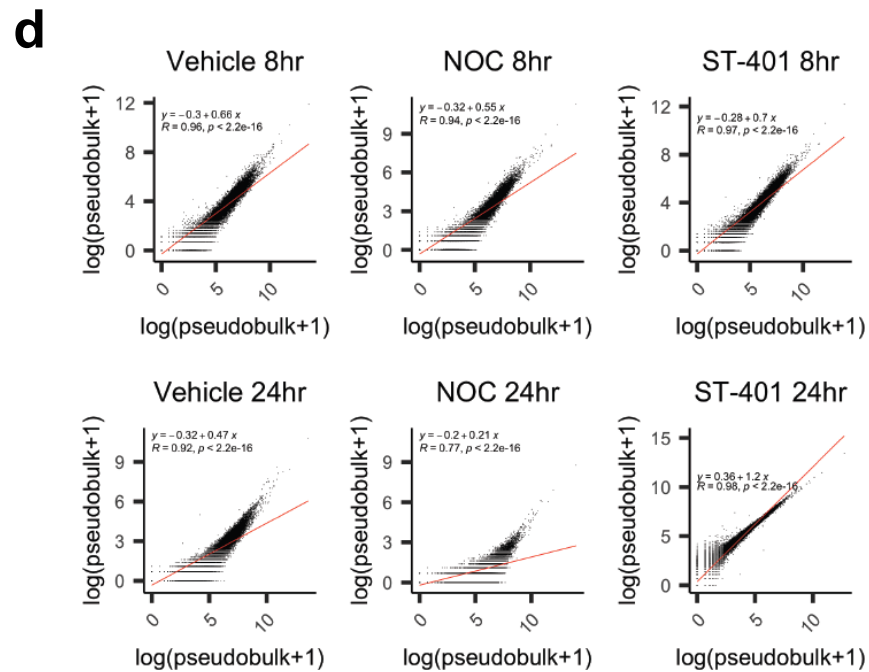



**Supplementary figures S5g-h: Gene-enrichment analysis at 24h using Metascape.** After scRNAseq analysis, genes with statistical significance differences were divided into 4 groups: genes upregulated (up) in ST and downregulated (down) in NOC (**gi**), genes up in ST and up in NOC (**gii**), genes down in ST and down in NOC (**hi**) and genes down in ST and up in NOC (**hii**). These groups were then analyzed using the platform Metascape for gene enrichment analysis.

**g<sub>i</sub> Quadrant 1: ST-401↑ NOC↓**

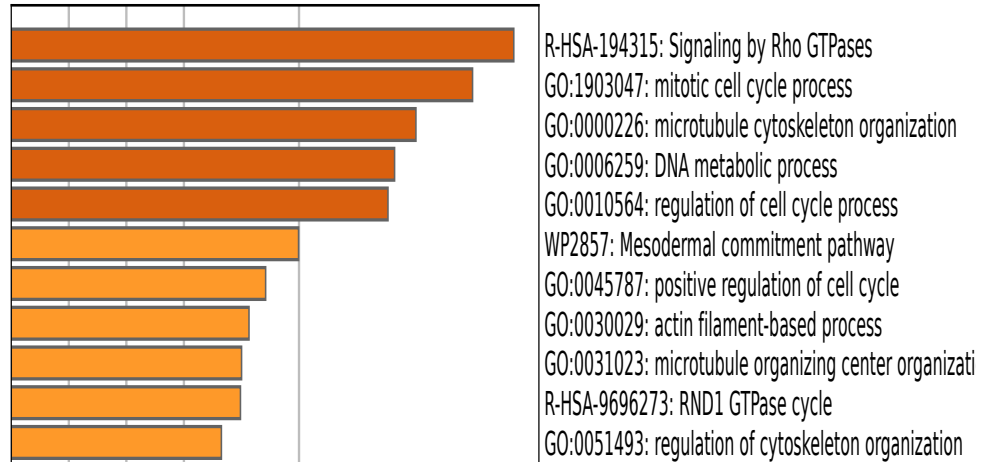

**g<sub>ii</sub> Quadrant 2: ST-401↑ NOC↑**

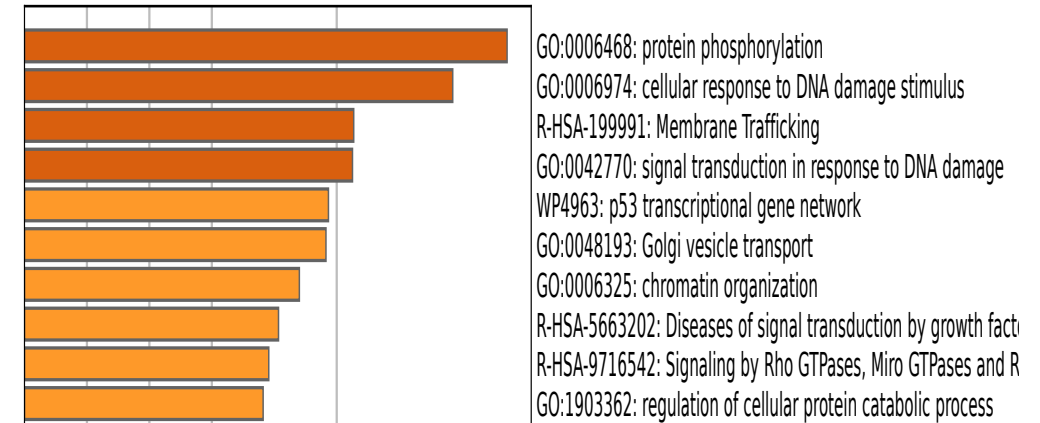

**h<sub>i</sub> Quadrant 3: ST-401↓ NOC↓**

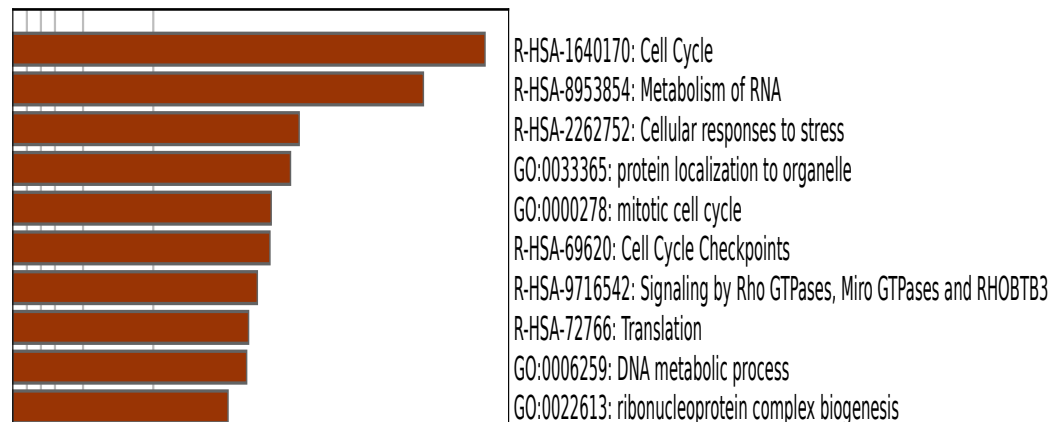

**h<sub>ii</sub> Quadrant 4: ST-401↓ NOC↑**

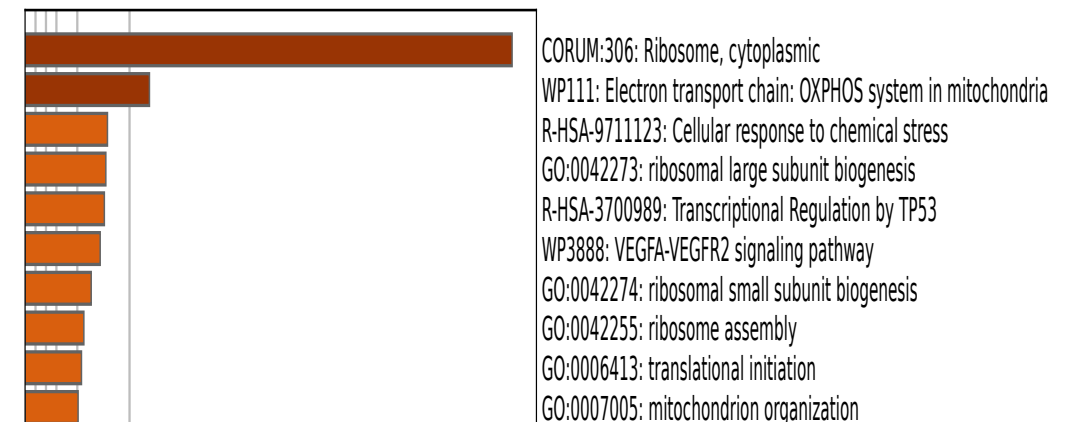

**Supplementary figure S5i:** Dimensionality reduction using Principal Component Analysis (PCA) analysis of the cluster distribution of CTR, NOC and ST-401 treated HCT116 cells for 8h and 24h. Clusters confirmed more complex cluster distributions between CTR, NOC and ST-401 treated for 24h compared to 8h.

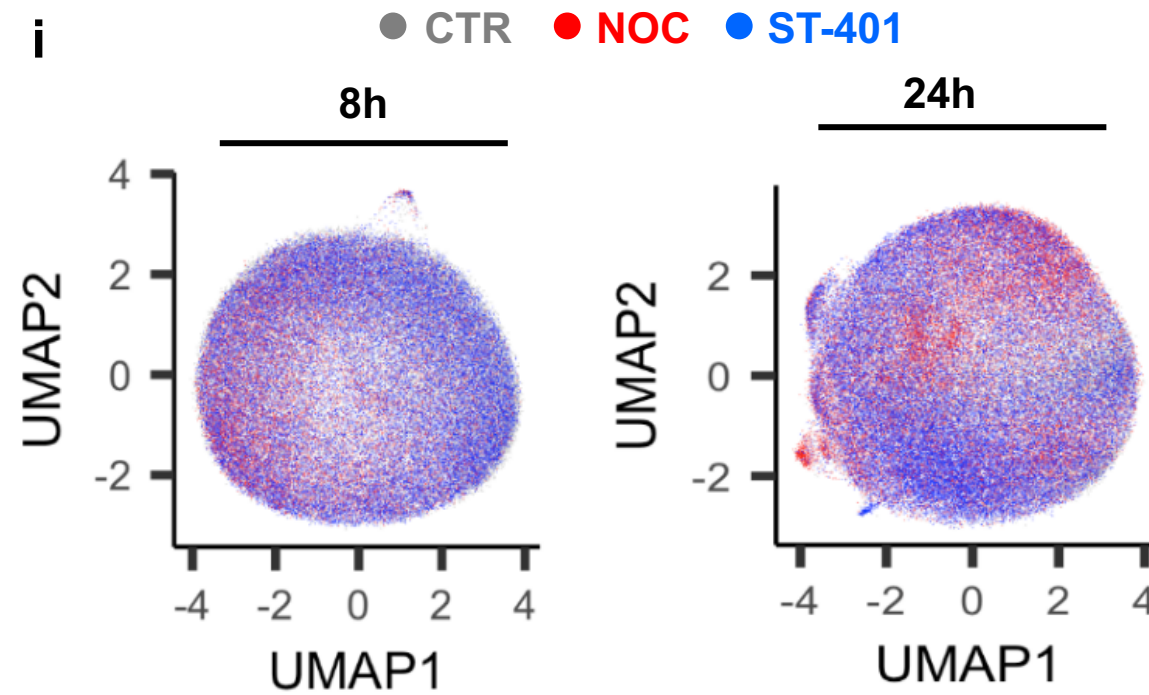

**Supplementary figure S6a-b:** Ponceau Red staining of gels shown in Figure 6. **a)** Representative ponceau Red stain of gel used for Puromycin analysis. **b)** Representative ponceau Red stain of gel used for Puromycin analysis.

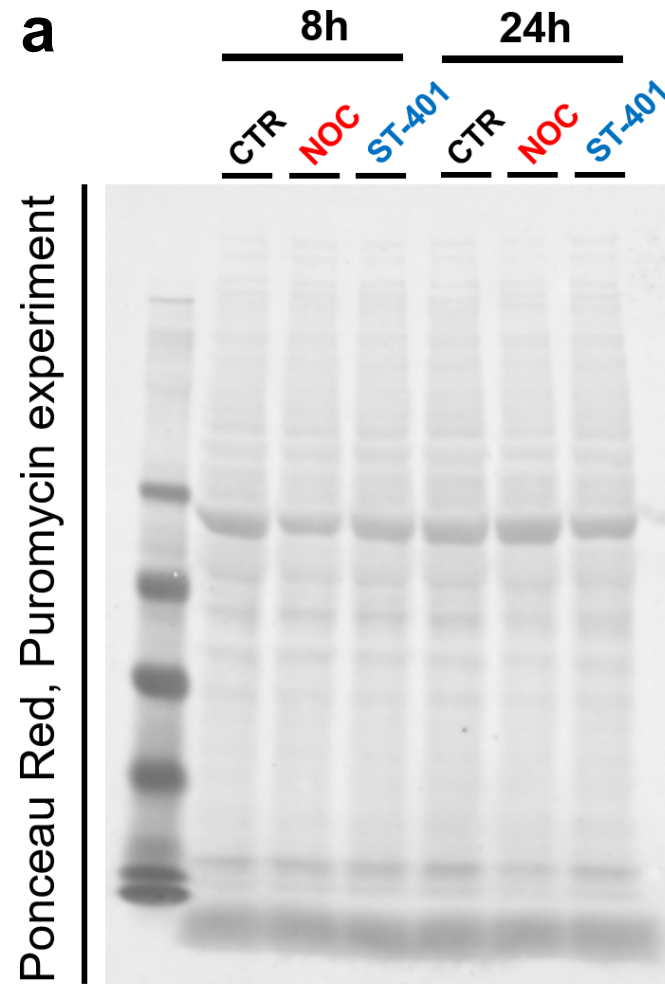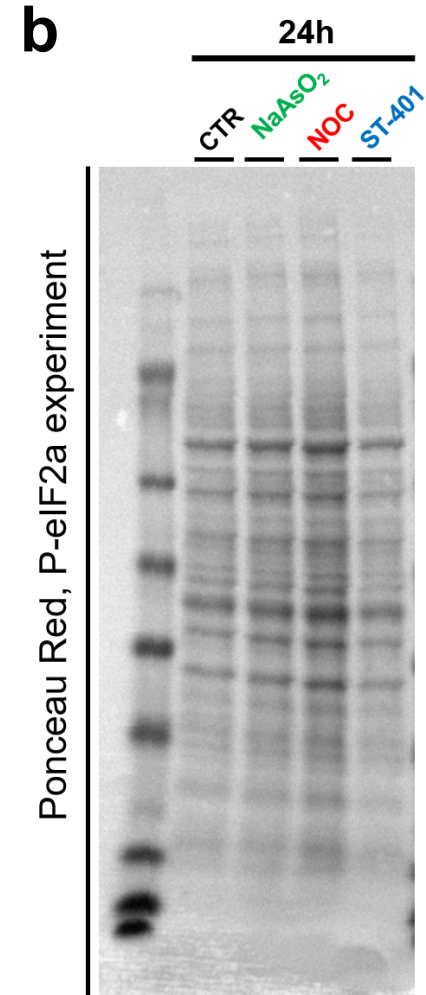

**Figure S7a-b:** NOC (100 nM) and ST-401 (100 nM) treatment for 24h affects spare capacity and proton leak in HCT-116 cells. **a-b)** Spare capacity and proton leak were calculated from Figure 7e. Statistics: Data are shown as mean  $\pm$  s.e.m. of 5 independent experiments. Ordinary one-way ANOVA analysis resulted in \*\*\*= $p < 0.001$  compared to CTR.

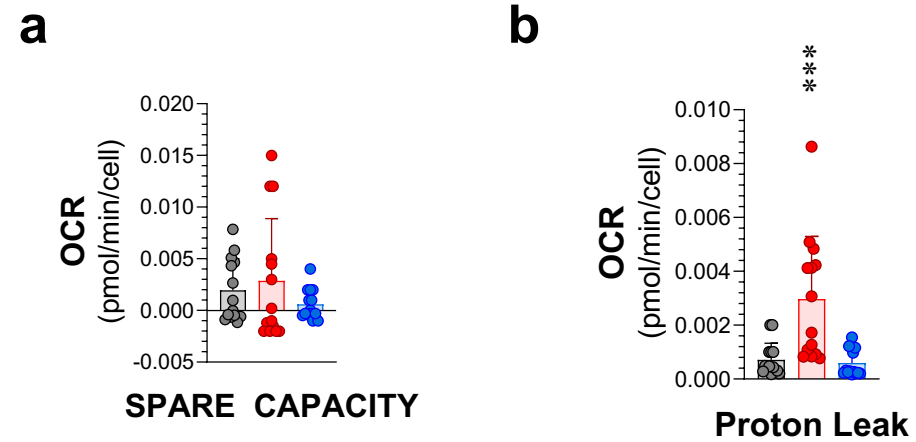

**Figure S8a-b:** NOC (100 nM) and ST-401 (100 nM) treatment for 24h affects non-mitochondrial respiration and maximal respiration as measured by Cell Mito Stress Test, in SF-539 and SNB-19 cells. Analysis from results shown in Figure 8e&g.

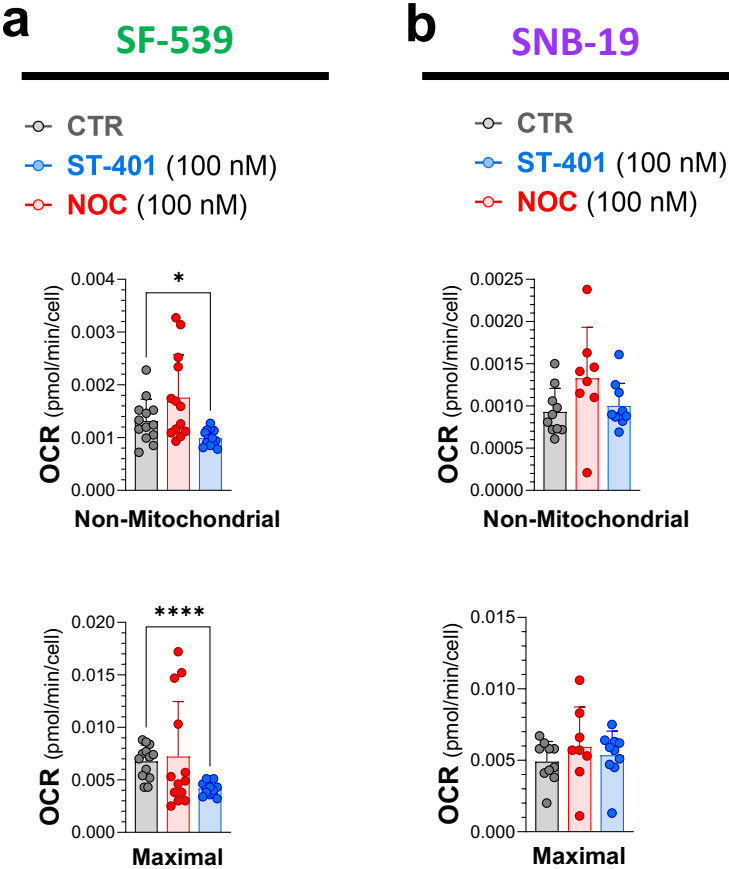

**Figure S9a-b:** NOC (100 nM) and ST-401 (100 nM) treatment for 24h affects mRNA encoding for immune responses in HCT-116 cells. **a-b)** scRNAseq data showing the expression of select mRNAs involved in cancer immunotherapy, as well as HLA genes. Analysis for data presented in Figure 5f.

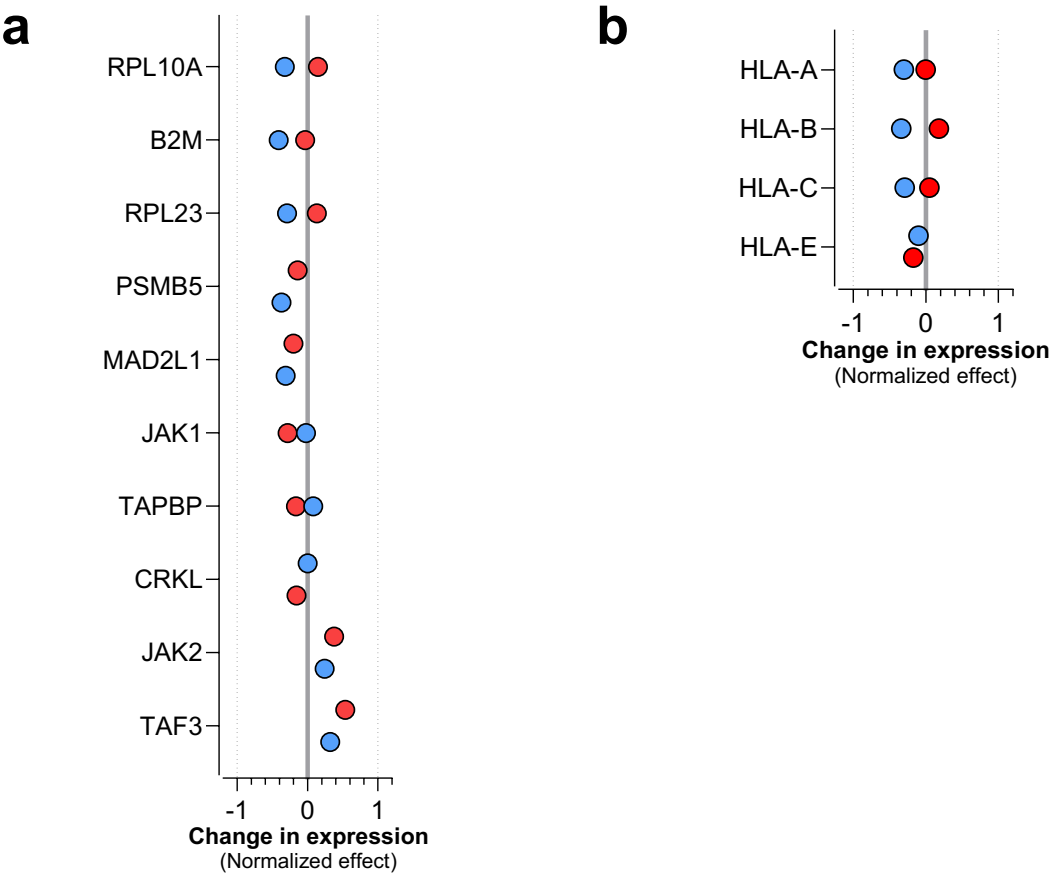

## Graphical Abstract

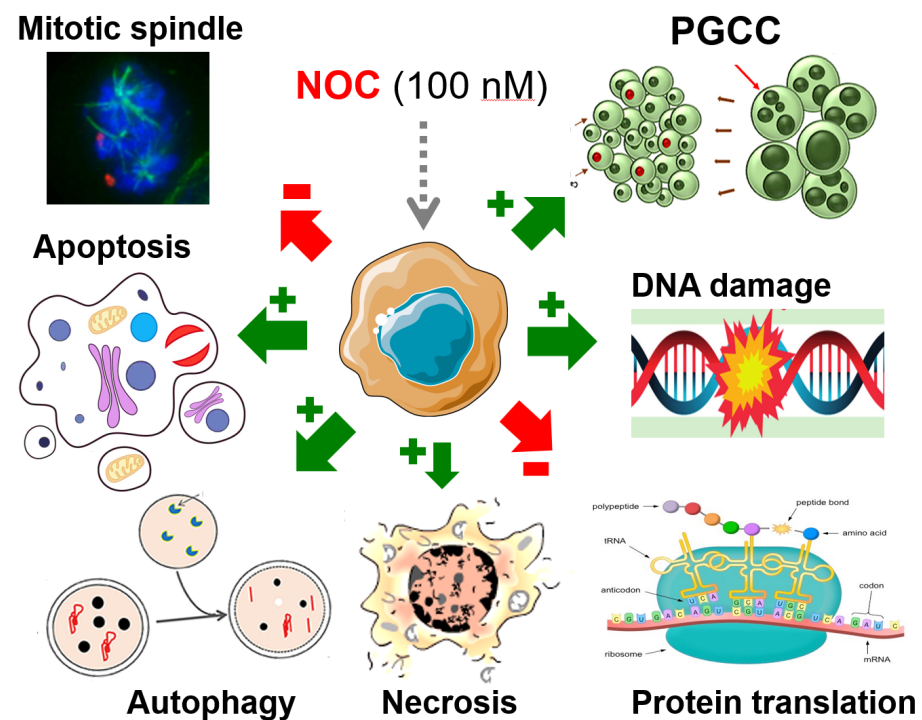

Diagram depicting that NOC treatment of HCT116 cells leads to death in mitosis, increases autophagy, necrosis and apoptosis, reduces protein translation and triggers the generation of PGCCs.

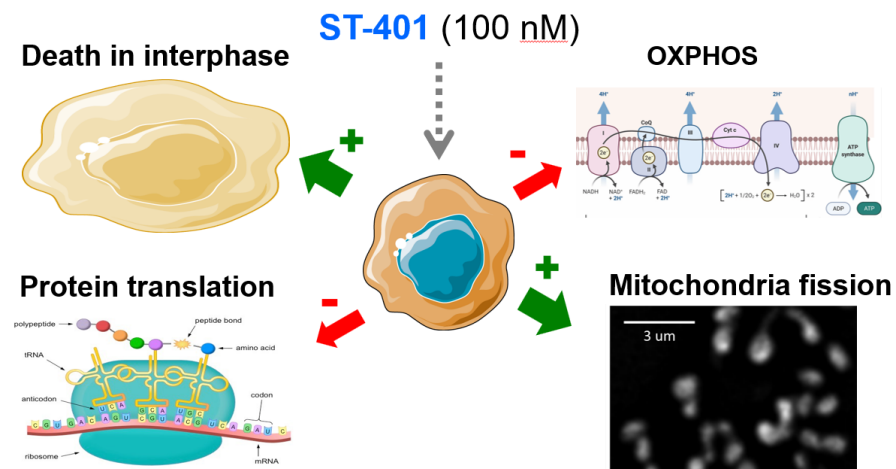

Diagram depicting that ST-401 treatment of HCT116 cells leads to death in interphase, transient reduction in protein synthesis, mitochondria fission and reduction in OXPHOS.
